# Supplementary material for: Multi-decadal initialized climate predictions using the EC-Earth3 global climate model
Source: Copernicus journal article supplement (doi:10.5194/egusphere-2025-1208), 2025-03-27
Supplement: Supplementary file [file egusphere-2025-1208-AC1-supplement.pdf]

## Summary

The study by Mahmood et al. makes an important step forward in understanding initialized prediction on decadal timescales (out to 30 years), a topic that is only rarely addressed due to computation costs. The results are very interesting, and ultimately seem to hinge on the fact that the initialized runs push AMOC into a weakened state that is outside the range of what is captured by the uninitialized simulations. The authors could enhance the impact of this study by focusing in a bit more on this topic – is this a realistic plausible reality? Why do these differences exist in the Lab Sea convection? And if initialized predictions are perhaps unreliable at this timescale (multi-decadal), should the community be pushing instead towards what the authors refer to as “variability-constrained projections” (which would benefit from even a brief description).

**Author Response:** We thank the reviewer for providing thoughtful comments on the paper which lead to improved manuscript. Following the reviewer’s suggestions, we have expanded the discussion related to AMOC drift in initialized predictions. We have also expanded on the discussion related to variability constrained projections.

## Major Comments:

- The discussion in the first paragraph of Section 3.1 should much more nuanced. The authors state that most land areas show ACC that is positive and statistically significant, with an exception of South America; But looking at Fig 1, there is a *lot* of stippling indicating things are not significant, even over land. Signals over Australia, for example, are rarely significant. In comparing with Fig S1, again it seems that significance has actually dropped dramatically in the case with fewer years (most notable over the Indian Ocean and Pacific). This calls into question the assertion that “a reduced sample size (due to initializing by every fifth year) does not strongly affect the skill of the prediction system.”

**Author Response:** We agree with the reviewer that this section needed more attention which we have now modified. In particular we changed the text to reflect that the new prediction system has relatively fewer regions with significant ACC compared to the previous system. The modified text reads as: “These results are generally consistent with the ACC values computed from a updated version of the previous decadal hindcast system (Bilbao et al., 2021) that was initialized every year (Figure S1a and S1b), in supplementary material) and using every 5th start-date (Figure S1c and S1d). When subsampling the system to use every 5th start-date (Figure S1c and S1d) from the previous prediction system the ACC loses significance in several regions in which also the new 30 year prediction system has no significant ACC. These results suggest that while overall patterns of skill remain similar in reduced initializations compared to annual initializations, however, there may be sampling uncertainties induced by the reduced number of initializations.”

- Figure 1: Given how much of the signal is not significant and thus stippled, I wonder if the fig would be more readable if stippling indicated where things are significant? It's hard to discern at first glance right now.

**Author Response:** The reason why we apply stippling over the non-significant values is to not obscure the results which are significant, that are the ones we are really interested in. The symbols on top of the colored values make it harder to see shading below and identify the areas with maximum correlations, therefore we prefer to keep the stipplings on non-significant values.

- Discussion of Fig 2 notes the different mean state in initialized predictions, but should also discuss the much larger bias as a result.

**Author Response:** We modified the sentence discussing these results to indicate that the drift results in large biases in initialized predictions. The modified sentence reads as: “ In the SPNA region, the SSTs tend to drift towards a lower (i.e. cooler) mean state a few years after initialization resulting in larger biases (Fig. 2).”

- The discussion around the Labrador Sea is interesting, as it points to inherent differences between initialized and uninitialized models. Some added context would strengthen the section further; for instance, is a shutdown in the Lab Sea convection rooted in any observations? Is it realistic, or an unwanted model behavior? *Why* does this happen in initialized runs?

**Author Response:** Observational records of the Labrador Sea show intermittent deep-convection events, closely tied to interannual-to-decadal variability in the North Atlantic Oscillation, whose positive phase enhances winter mixed-layer deepening (Yashayaev & Loder, 2016). By contrast, the convection shutdown seen in EC-Earth is connected to a fundamentally different mechanism, both in timescale and driving process. Meccia et al. (2023) investigates this mechanism at depth showing that it is driven by the accumulation of salinity anomalies in the Arctic and their release into the North Atlantic, which occur with a periodicity of ~150 years. Although such a centennial-scale process cannot be ruled out in the real ocean, instrumental records are too short to detect it and proxy data offer no clear evidence that it exists. Regarding why this shutdown occurs systematically in the initialized forecasts, Figure 11 of Bilbao et al. (2021) demonstrates that, upon initialization, the model rapidly transitions in surface density toward its historical climatology in the Labrador Sea, which occurs without a corresponding subsurface adjustment. This surface–subsurface imbalance amplifies stratification, prematurely halting deep convection, and trapping the model in a prolonged suppressed state. We therefore believe that the shutdown in the model is an unrealistic artefact.

This distinction between the observed NAO-driven intermittency versus model-specific, centennial-scale shutdown in initialized runs is now discussed in the revised manuscript (see lines 258-262).

- Line 305: “The climate predictions based on these variability-constrained projections (e.g. Mahmood et al., 2022; Donat et al., 2024) even show higher and more widespread added skill, compared to the initialized predictions presented in this study, for both 10 and 20 year mean predictions.” – this seems like a huge point, but isn’t backed up by comparison within this text. It would make a stronger paper overall to focus in on this as a piece of the larger manuscript.

**Author Response:** We have added a couple more sentences to expand the discussion related to this point. A comparison of results between variability constrained and initialized predictions is not included in this manuscript as it is out of the scope of the current study. However, a separate ongoing work using multi-decadal predictions from different climate models could provide a comparison between constrained projections and the initialization climate predictions.

#### Minor Comments

- Line 51: What is meant by “constraining patterns of climate variability in large ensembles of the uninitialized projection simulations”? Some added description would help.

**Author Response:** We modified the sentence to reflect that we use sea surface temperature anomalies. The modified sentence read as “This has been found, for example, by combining information from decadal predictions and longer-term uninitialized projections (Befort et al. 2022) and constraining patterns of sea surface temperature anomalies in large ensembles of the uninitialized projection simulations (Mahmood et al., 2021, 2022; Donat et al., 2024).”.

- Line 79: “...initialized on the first of November every 5th year...” – is there any rationale for using November? Is this consistent with other experiments? Would differences be expected if initializing in spring/summer instead of fall/winter? (Perhaps the Lab Sea response would differ in particular?)

**Author Response:** Decadal predictions are typically initialized in the first of November to be able to predict the first winter completely, which is relevant for ENSO and NAO studies. Indeed, the new DCPD protocol for CMIP7 will strongly recommend that all systems are initialized on the 1st of November, to ensure consistency across models. In CMIP6 several decadal prediction systems were initialized in the 1st of January, which has hindered the studies focusing on NAO predictability to systematically exclude the first winter, that is the most predictable one. The DCPD protocol for

CMIP7 also includes a new experiment that focuses on multi-annual timescales (with lead times up to 28 months) and that will explore the dependence of the results to the month of initialization.

- Line 90: "...on the order of  $10^{-5}$  K)" – to clarify, is this meant to be  $1e^{-5}$ ? That seems like it might actually be rather large, but I'm typically working in uninitialized space, wherein  $1e^{-14}$  perturbations are common. Could the authors comment on if this is a standard magnitude for initialized predictions?

**Author Response:** Yes, it was meant to be  $1e^{-5}K$ . This value is much smaller than the observational uncertainty and therefore, we do not expect large differences if an even smaller number is used.

- Line 106: "...to a uniform five-degree grid" – that's really coarse; is there a reason to convert to five degrees? Is this the native resolution of some runs vs others?

**Author Response:** This was done to compare with observational data from HadCRUT which comes with a 5 degree resolution. Besides this is the recommended practice for evaluating initialized climate predictions (e.g. Goddard et al., 2013) in order to minimize effects from small-scale noise in the identification of large-scale predictable signals.

- Line 141: "...evaluation periods are different (i.e. 1961-2020 for FY1-10, 1971-2020 for FY11-20 and 1971-2020 for FY21-29)." – Could you limit the evaluation period for FY1-10 to 1971 onwards arbitrarily, just to test the impact?

**Author Response:** We have now included a new supplementary figure (Figure S2) and also added related text in the revised manuscript. However, we also note that using a common analysis period introduces its own uncertainties since different initializations are needed for different forecast periods. See lines (157-162) and lines (173-175).

- Line 149: "...over land regions including northwest Canada and USA." – I'm not sure I see a lot of added value over the USA, it's mostly stippled? But Australia and the Middle East seem to show something more cohesive.

**Author Response:** There are several grid points which show significant residual correlation over Canada and central USA. We modified the sentence to indicate also added value over northern Australia and the Middle East. The sentence reads as: "For the FY1-10 we find significant added value over the Atlantic ocean and parts of the Pacific and over land regions including northwest Canada, central USA, the Middle East and northern Australia."

- Line 162: “Previous studies have shown that the decadal predictions can be highly skillful in forecasting temperature over SPNA region.” – Citations?

**Author Response:** Citations added in the revised version.

- Fig 2: Please add a legend for the lines, in addition to the description the caption for easier readability.

**Author Response:** Agree, legend is added in new figures.

- Fig 5: Suggest adding stippling for significance, as in other maps

**Author Response:** Agree. Stippling is now added over the regions where differences are not statistically significant.
